# Supplementary material
Source: PubMed Central journal article supplement (PMC6139052)

Figure S1

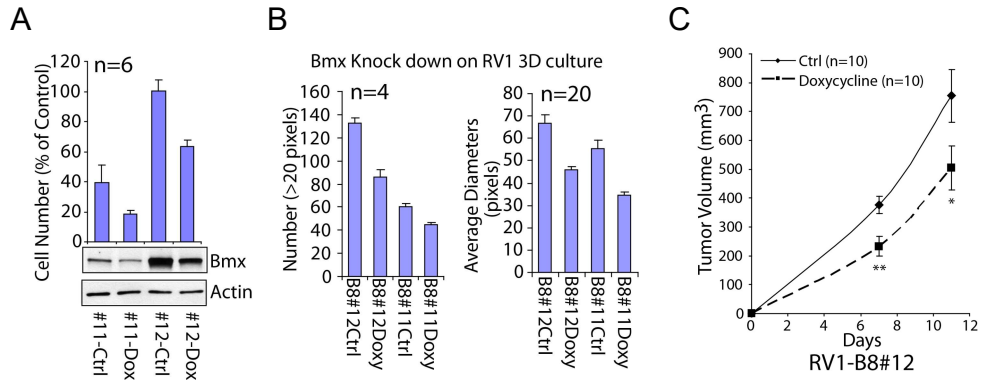

Figure S2

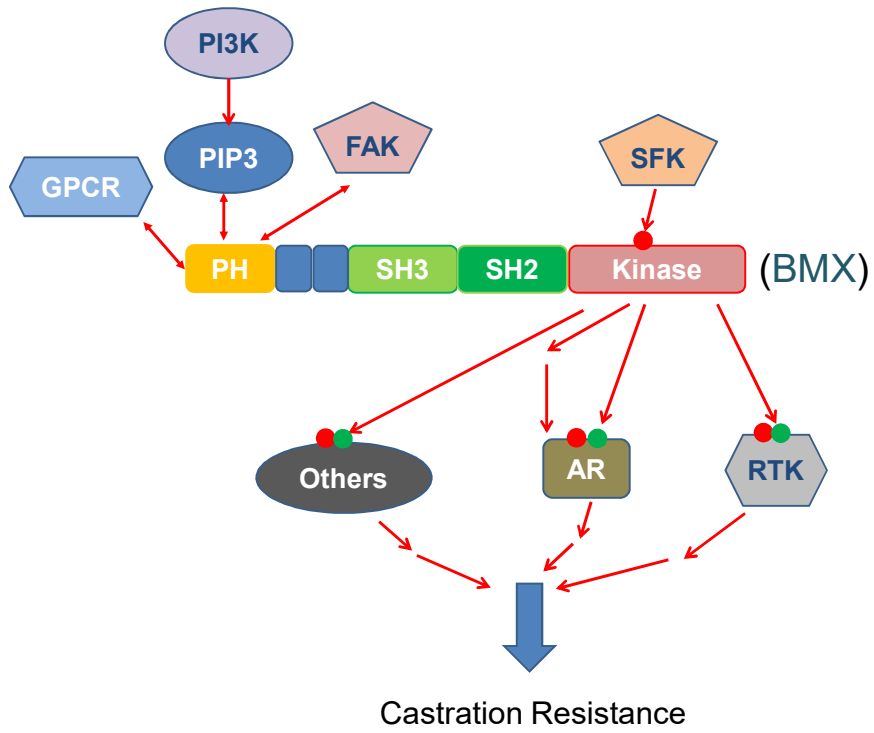

Figure S3

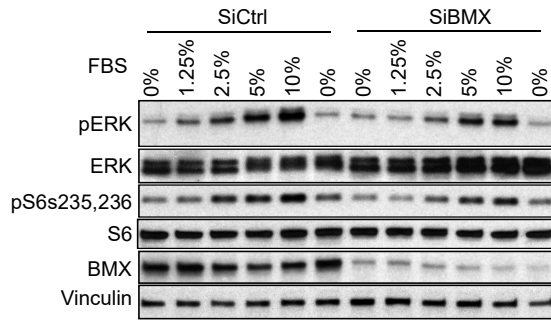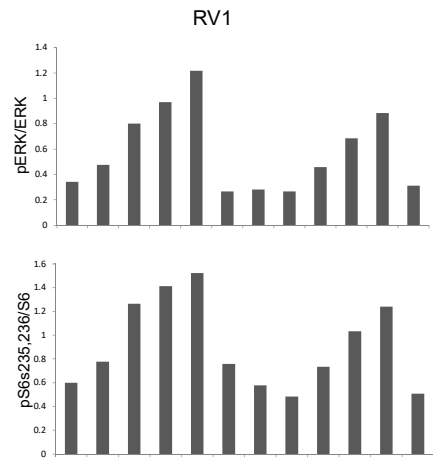

Figure S4

A

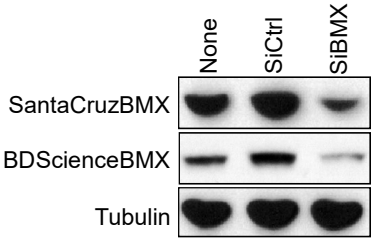

B

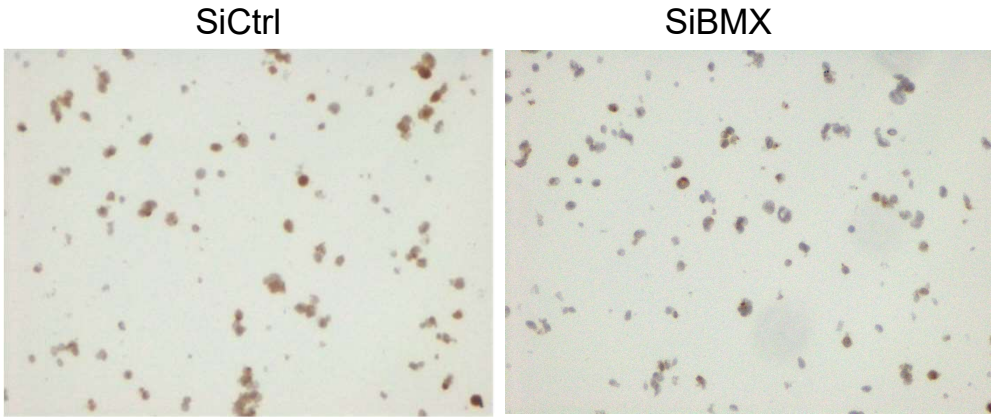

CWR-22RV1

Figure S5

Microarray of Human Tissue

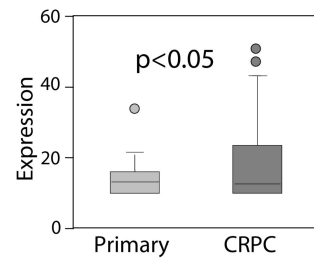

Figure S6

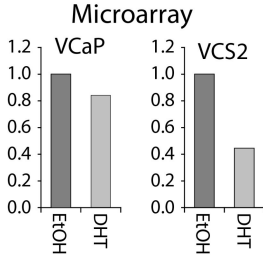



## Figure S8

AR binding sites at BMX gene (intron 1):

Chx: 15,430,351 ; 15,431,227

```
ctcctaaggaagttgccagagagagtgccctaagcagaggagaggagcagaagaagaggttactgaaaagaagaaagacttagaaaa
gctctatggggcactgaagattaactcacacctaagcaaaacttagctcaaaaagactagcattaagattcttccttttgagaaaaatgatctc
ccaagatgctgggttttatacacttatttggatacaattaaggatgatgctccaagatctgagaattgactgtcaatgttaaaagattctgccaatcatg
ccaagatcaacttaactttcccctcctgcataacatcatgtgaataaggatctgcaggttctgtgaagccagatattgtccttggccagatcctaagac
ttttgaaccactttactgatcctcagcaaacctttgttctgtttaaaccacatcacatttgcagtatttagcacgaagataagcgggcctggcatttg
gacaaatattgaagatcaagttgtcacagggccctccagttccctccagatcccacccactggagcgtcttcccttcttccaccctctgctcta
ctgcccctccaccacatgtatttttaacatcttgacacctcaaaaacttttagctatgcatgtaaaagtaagagaggataactaaaccaagtaag
ggtaaggaattgctatcttactcgaattttaaagataaaactttaaagacaccacctgagccagtcaggaatacacttctctgttgagg
```

AR binding sites at BMX gene (intron 4,5):

Chx: 15,443,805 ; 15,444,611

```
ccctccccctctgccacaagaaaacaccatggttgaaccactcacttttccagatatctctaaaactcaacatcaagctgatctgtatgatt
tactagttatttttctcaaaaatgatgttaattgtgttctcaacatactcatggttagactttctttttcttttggcttataactgttgagtgaaagacctata
tccctcgggaaccattgtcttacctgggttgctggcacaatgggggttttattgttctgtgataacagcacctactgaatgtttctccttggatcaagtttgc
acgtctgttttctctgtctgctcctcagagataaggggtaacccacactgctggtcaagtaccatagtggttctctgtggacgggaagtctgtgttc
cagcagagctgtaaacagagcccaggatgacctctgggaagcatgtaattgtgttctctgttggactggacgtgggtggatgctccattagg
ctaaacctgccagagggcagaagagcttgcagaaaaacaagatgtccagattggtgcatcatgaaattcagcccttcagatgctatgtgacaaa
tgaatctcattcagggtcaattgagtcatggcattaagataatacaataataacatctgaccttttcttctatgagaacattttaaattgaaatca
ttaatcaagcaatgagctgttttctccataatttttctg
```



Figure S9

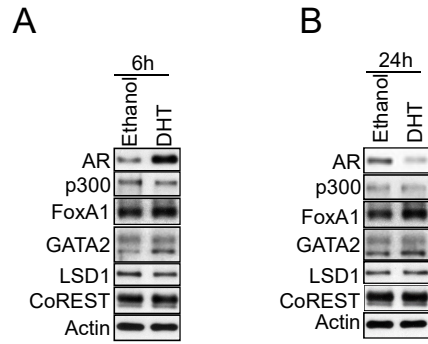

Supplement: NIHMS1500293-supplement-1.pdf [file NIHMS1500293-supplement-1.pdf]
